# Supplementary material
Source: publisher figshare collection journal article supplement (https://gsajournals.figshare.com/ndownloader/files/24737906)
Supplement: Supplementary file 1 [file 24737906]

## Sheet: Table_1_Telomere_extensions
Chromosome	Arm	Extension span (bp)	Telomere extension start site *	External telomere repeat addition site *	External TTAGCC telomeric repeat span (bp)
Otip_I	L	16822	27184	10363	10362
	R	24306	8885185	8860879	31405
Otip_II	L	10122	25180	15059	15058
	R	10413	9010174	8999761	19801
Otip_III	L	4060	16298	12239	12238
	R	25188	9621518	9596330	13932
Otip_IV	L	34114	39782	5669	5668
	R	4711	11184555	11179844	463
Otip_V	L	23599	30663	7065	7064
	R	29106	10812563	10783457	4916
Otip_X	L	32697	51845	19149	19148
	R	133498	11309184	11175686	14155
Total		348636			154210

## Sheet: Table_2_Oscheius_genome_assembl
Species	Oscheius tipulae CEW1 nrOscTipu1.3	Oscheius tipulae CEW1 Ot_2.0	C. elegans PRJNA13758 WBPS12
Reference	This work	(Besnard et al. 2017)	See https://parasite.wormbase.org/Caenorhabditis_elegans_prjna13758/Info/Index/
Genome
Span (Mb)	60.9	59.5	100.3
Number of Scaffolds	6 (+MT*)	191	6 (+MT)
Scaffold N50 (Mb)	10.8 (chromosomal)	1.2	17.5 (chromosomal)
Number of contigs	6 (+MT)	256	6 (+MT)
Contig N50 (Mb)	10.8 (chromosomal)	0.7	17.5 (chromosomal)
Genome BUSCO **	C:90.7%[S:88.7%,D:2.0%],F:1.8%,M:7.5%	C:89.0%[S:86.5%,D:2.5%],F:2.1%,M:8.9%	C:99.4%[S:98.9%,D:0.5%],F:0.1%,M:0.5%
Annotation
Proportion repeat	0.0793	7.85 %	21.95 %
Proportion coding ***	22.6 (37.09%)	19.1 (32.18 %)	28.8 (28.68 %)
Proportion intron	16.6 (27.29%)	16.6 (27.9 %)	33.1 (33.02 %)
Number of protein coding genes	16367¶	14626	20184
Proteome BUSCO **	C:90.2%[S:87.5%,D:2.7%],F:1.9%,M:7.9%	C:89.1%[S:86.2%,D:2.9%],F:2.0%,M:8.9%	C:100%[S:99.6%,D:0.4%],F:0%,M:0%

## Sheet: Table_3_Nigons_and_sex_chromoso
	Nigon is distinct in			Nigon is part of X chromosome in
	Rhabditina	Tylenchina	Spirurina	Rhabditina					Tylenchina		Spirurina
species	9 species	2 species	3 species	Ot	Ar	Ce	Hc	Pp	Sr	Sc	Bm	Ov	As
NigonA	yes	yes	yes
NigonB	yes	part of X	yes
NigonC	yes	yes	yes
NigonD	yes	part of X	yes (part)
NigonE	yes	yes	yes
NigonN	yes	yes	yes
NigonX	yes	part of X	part of X

## Sheet: Table_S1_Nematode_chromosome_nu
Table of chromosome numbers
Clade	Subgroup	n in majority	others
Clade I	Trichocephalida	2020-03-04
Clade II		?
Clade C	Desmodoridae	7
Clade III	Oxyuromorpha	2020-04-08
	Ascaridomorpha	variable	highly variable: n = 1-24
	Spiruromorpha	2020-05-06	rarely n = 4, 7
Clade IV	Strongyloides	3
	Meloidogyninae	17	parthenogens variable to n > 50
	Pratylenchus	5 - 7
	Panagrolaimus	4	triploid parthenogens n = 12 = 3x4
	Steinernema	6	also n = 8,10
Clade V	Strongylomorpha	6
	Rhabditomorpha	6	varies n = 1 - 9 (especially variable in Diploscapter)
	Diplogasteromorpha	6	one with n = 5

## Sheet: Table_S2_Software
Software	Version	Source	Parameters used if not default	Reference
AGAT	0.2.3	https://github.com/NBISweden/AGAT		(Dainat, 2020)
bbduk	(bbtools) 38.51-0	http://sourceforge.net/projects/bbmap/	bbduk.sh ref=bbmap-38.51-0/resources/adapters.fa qtrim=w trimq=20	(Bushnell, 2017)
blast+	2.9.0	https://anaconda.org/bioconda/blast	-max_target_seqs 10 -max_hsps 1 -num_threads 8 -evalue 1e-25	(Camacho et al., 2009)
blobtools	v2.0.0alpha	https://github.com/blobtoolkit/blobtools2		(Dominik R. Laetsch and Blaxter, 2017)
BUSCO	4.0.2	https://gitlab.com/ezlab/busco	-l nematoda_odb10	(Simão et al., 2015)
bwa	0.7.17-r1188	https://github.com/lh3/bwa	mem	(Li and Durbin, 2009)
Canu	1.9	https://anaconda.org/bioconda/canu		(Koren et al., 2017)
diamond	0.9.24	https://anaconda.org/bioconda/diamond	--sensitive --max-target-seqs 1 --evalue 1e-25	(Buchfink et al., 2015)
flye	2.6-g0d65569	https://github.com/fenderglass/Flye	--genome-size 70m --asm-coverage 800 --plasmids --meta	(Kolmogorov et al., 2019)
GAP5	2.0.0b11	https://www.sanger.ac.uk/tool/gap5/		(Bonfield and Whitwham, 2010)
GeneMark	4.57_lic	http://topaz.gatech.edu/GeneMark/license_download.cgi		(Lomsadze et al., 2005)
Guppy	2.3.35	https://nanoporetech.com/
KinFin	1.0.3	https://github.com/DRL/kinfin		(Dominik R Laetsch and Blaxter, 2017)
medaka	0.9.2	https://github.com/nanoporetech/medaka		(Oxford Nanopore Technologies Ltd., 2017)
minimap2	2.17	https://github.com/lh3/minimap2	-x map-ont	(Li, 2018)
MIRA	4.0.2	https://sourceforge.net/projects/mira-assembler/files/MIRA/stable/	job=est,denovo,accurate technology=454	(Chevreux et al., 1999)
Orthofinder	2.3.11	https://github.com/davidemms/OrthoFinder	-M msa -S blast	(Emms and Kelly, 2019, 2015)
PASA	2.3.3	https://github.com/PASApipeline/PASApipeline		(Haas et al., 2003)
pilon	1.22-0	https://github.com/broadinstitute/pilon	--fix-all	(Walker et al., 2014)
R	3.6.0	https://www.r-project.org/		(Team, 2019)
racon	1.2.1	https://github.com/isovic/racon	-m 8 -x -6 -g -8 -w 500	(Vaser et al., 2017)
RaGOO	1.11	https://github.com/malonge/RaGOO	-i 0.51	(Alonge et al., 2019)
Repeatmasker	4.0.7	http://www.repeatmasker.org/RMDownload.html	-s	(Smit et al., 2015)
RepeatModeler	2.0.1	http://www.repeatmasker.org/RepeatModeler/	-LTRStruct	(Flynn et al., 2020)
TransposonPSI	8222010	http://transposonpsi.sourceforge.net/		(Haas, 2007)
LTRharvest	(GenomeTools) 1.5.9	http://genometools.org/pub/	-tabout no	(Ellinghaus et al., 2008)
LTRdigest	(GenomeTools) 1.5.9	http://genometools.org/pub/		(Steinbiss et al., 2009)
USEARCH	7.0.1090	http://drive5.com/usearch/	--id 0.8	(Edgar, 2010)
samtools	1.9	https://github.com/samtools/samtools		(Li and Durbin, 2009)
Snippy	4.6.0	https://github.com/tseemann/snippy		(Seemann, 2014)
Freebayes	v1.3.2	https://github.com/ekg/freebayes		(Garrison and Marth, 2012)
IRF	3.05	http://tandem.bu.edu/irf/irf.download.html	Positional arguments: 3 4 12 2 1 50 30000 300000	(Warburton et al., 2004)
TRF	4.09	http://tandem.bu.edu/trf/trf.download.html	Positional arguments: 2 7 7 80 10 50 500	(Benson, 1999)
Mummer	3.1	http://mummer.sourceforge.net/		(Kurtz et al., 2004)
Dot	commit 42701ca	https://github.com/dnanexus/dot	DotPrep.py --unique-length 500 --overview 99999	(Nattestad, 2018)
Clustal W	2.1	http://www.clustal.org/		(Thompson et al., 1994)
JalView	2.10.1	https://www.jalview.org/		(Waterhouse et al., 2009)
HelitronScanner	1	https://sourceforge.net/projects/helitronscanner/		(Xiong et al., 2014)
WormMine	WS277	http://intermine.wormbase.org/tools/wormmine/begin.do
KEGGREST	1.26.1	https://bioconductor.org/packages/release/bioc/html/KEGGREST.html		(Tenenbaum, 2019)
Rtsne	0.15	https://github.com/jkrijthe/Rtsne	max_iter = 1000, dims = 2	(Krijthe, 2015)

## Sheet: Table_S3_Otipulae_Assemblies
Read set	Assembler	Genome contiguity metrics (in Mb)					BUSCO* scores
		# contigs	Largest contig	Total length	N75	L75	C*	D*	F*	M*
raw	flyemeta	7	11.3	60.11	9.02	5	91.1	2.2	6.7	8.9
	redbean	945	0.59	47.46	0.04	323	64	1.7	34.3	36
	shasta	55	5.66	59.83	1.74	12	91.2	2.3	6.5	8.8
decontaminated	flyemeta	11	11.3	60.04	9.01	5	90.9	2	7	9.1
	flye	7	11.24	60	9.01	5	91	2	7	9
	redbean	19	11.17	59.63	8.82	5	90.9	2	7	9.1
	shasta	34	9.99	59.47	2.26	9	91	2.3	6.7	9
	canu	13	11.28	59.94	8.83	5	90.7	2	7.3	9.3
40x error corrected	flyemeta	13	11.18	59.87	5.13	6	91.2	2.1	6.6	8.8
	flye	7	11.29	60	9.03	5	90.6	1.9	7.4	9.4
	redbean	29	11.17	59.09	2.58	9	90.7	2.1	7.1	9.3
	shasta	964	0.26	52.46	0.05	509	74.5	6.o	19.5	25.5

## Sheet: Data for Table_S3_Otipulae_BUSC
					BUSCO assembly						BUSCO genome									BUSCO assembly					BUSCO proteome					# of protein coding genes
Species	BUSCO assembly	BUSCO proteome	# of protein coding genes	Species	C	S	D	F	M	#	C	S	D	F	M	#	# of protein coding genes		Species	C	S	D	F	M	C	S	D	F	M
Oscheius tipulae (nOt3.0)	C:90.8%[S:88.7%,D:2.1%],F:1.8%,M:7.4%,n:3131	C:90.7%[S:87.9%,D:2.8%],F:2.4%,M:6.9%,n:3131	16138	Oscheius tipulae (nOt3.0)	90.8	88.7	2.1	1.8	7.4	3131	90.7	87.9	2.8	2.4	6.9	3131	16138		Oscheius tipulae (nOt3.0)	90.8	88.7	2.1	1.8	7.4	90.7	87.9	2.8	2.4	6.9	16138
Oscheius tipulae (nOt2.0)	C:90.5%[S:87.7%,D:2.8%],F:2.4%,M:7.1%,n:3131	C:89.1%[S:86.2%,D:2.9%],F:2.0%,M:8.9%,n:3131	14626	Oscheius tipulae (nOt2.0)	90.5	87.7	2.8	2.4	7.1	3131	89.1	86.2	2.9	2	8.9	3131	14626		Oscheius tipulae (nOt2.0)	90.5	87.7	2.8	2.4	7.1	89.1	86.2	2.9	2	8.9	14626
Auanema rhodensis	C:89.6%[S:89.1%,D:0.5%],F:1.7%,M:8.7%,n:3131	C:85.4%[S:84.6%,D:0.8%],F:1.2%,M:13.4%,n:3131	10861	Auanema rhodensis	89.6	89.1	0.5	1.7	8.7	3131	85.4	84.6	0.8	1.2	13.4	3131	10861		Auanema rhodensis	89.6	89.1	0.5	1.7	8.7	85.4	84.6	0.8	1.2	13.4	10861
Caenorhabditis elegans	C:99.4%[S:98.9%,D:0.5%],F:0.1%,M:0.5%,n:3131	C:100.0%[S:99.6%,D:0.4%],F:0.0%,M:0.0%,n:3131	20184	Caenorhabditis elegans	99.4	98.9	0.5	0.1	0.5	3131	100	99.6	0.4	0	0	3131	20184		Caenorhabditis elegans	99.4	98.9	0.5	0.1	0.5	100	99.6	0.4	0	0	20184
Caenorhabditis briggsae	C:99.0%[S:98.4%,D:0.6%],F:0.4%,M:0.6%,n:3131	C:99.2%[S:98.5%,D:0.7%],F:0.4%,M:0.4%,n:3131	20829	Caenorhabditis briggsae	99	98.4	0.6	0.4	0.6	3131	99.2	98.5	0.7	0.4	0.4	3131	20829		Caenorhabditis briggsae	99	98.4	0.6	0.4	0.6	99.2	98.5	0.7	0.4	0.4	20829
Caenorhabditis nigoni	C:99.4%[S:98.6%,D:0.8%],F:0.1%,M:0.5%,n:3131	C:96.8%[S:95.7%,D:1.1%],F:1.4%,M:1.8%,n:3131	29167	Caenorhabditis nigoni	99.4	98.6	0.8	0.1	0.5	3131	96.8	95.7	1.1	1.4	1.8	3131	29167		Caenorhabditis nigoni	99.4	98.6	0.8	0.1	0.5	96.8	95.7	1.1	1.4	1.8	29167
Caenorhabditis remanei	C:99.2%[S:98.1%,D:1.1%],F:0.3%,M:0.5%,n:3131	C:93.1%[S:91.9%,D:1.2%],F:0.9%,M:6.0%,n:3131	26308	Caenorhabditis remanei	99.2	98.1	1.1	0.3	0.5	3131	93.1	91.9	1.2	0.9	6	3131	26308		Caenorhabditis remanei	99.2	98.1	1.1	0.3	0.5	93.1	91.9	1.2	0.9	6	26308
Caenorhabditis inopinata	C:98.8%[S:97.9%,D:0.9%],F:0.4%,M:0.8%,n:3131	C:98.7%[S:97.7%,D:1.0%],F:0.2%,M:1.1%,n:3131	21443	Caenorhabditis inopinata	98.8	97.9	0.9	0.4	0.8	3131	98.7	97.7	1	0.2	1.1	3131	21443		Caenorhabditis inopinata	98.8	97.9	0.9	0.4	0.8	98.7	97.7	1	0.2	1.1	21443
Haemonchus contortus	C:94.3%[S:93.2%,D:1.1%],F:0.8%,M:4.9%,n:3131	C:93.1%[S:91.6%,D:1.5%],F:1.1%,M:5.8%,n:3131	19473	Haemonchus contortus	94.3	93.2	1.1	0.8	4.9	3131	93.1	91.6	1.5	1.1	5.8	3131	19473		Haemonchus contortus	94.3	93.2	1.1	0.8	4.9	93.1	91.6	1.5	1.1	5.8	19473
Pristionchus pacificus	C:82.7%[S:81.1%,D:1.6%],F:1.3%,M:16.0%,n:3131	C:77.4%[S:75.2%,D:2.2%],F:1.0%,M:21.6%,n:3131	25992	Pristionchus pacificus	82.7	81.1	1.6	1.3	16	3131	77.4	75.2	2.2	1	21.6	3131	25992		Pristionchus pacificus	82.7	81.1	1.6	1.3	16	77.4	75.2	2.2	1	21.6	25992
Steinernema carpocapsae	C:78.3%[S:74.8%,D:3.5%],F:3.0%,M:18.7%,n:3131	C:74.7%[S:70.9%,D:3.8%],F:3.8%,M:21.5%,n:3131	30825	Steinernema carpocapsae	78.3	74.8	3.5	3	18.7	3131	74.7	70.9	3.8	3.8	21.5	3131	30825		Steinernema carpocapsae	78.3	74.8	3.5	3	18.7	74.7	70.9	3.8	3.8	21.5	30825
Meloidogyne hapla	C:58.1%[S:57.0%,D:1.1%],F:2.2%,M:39.7%,n:3131	C:70.6%[S:67.8%,D:2.8%],F:0.9%,M:28.5%,n:3131	14419	Meloidogyne hapla	58.1	57	1.1	2.2	39.7	3131	70.6	67.8	2.8	0.9	28.5	3131	14419		Meloidogyne hapla	58.1	57	1.1	2.2	39.7	70.6	67.8	2.8	0.9	28.5	14419
Strongyloides ratti	C:68.2%[S:66.5%,D:1.7%],F:1.5%,M:30.3%,n:3131	C:70.6%[S:67.8%,D:2.8%],F:0.9%,M:28.5%,n:3131	12464	Strongyloides ratti	68.2	66.5	1.7	1.5	30.3	3131	70.6	67.8	2.8	0.9	28.5	3131	12464		Strongyloides ratti	68.2	66.5	1.7	1.5	30.3	70.6	67.8	2.8	0.9	28.5	12464
Onchocerca volvulus	C:97.9%[S:97.3%,D:0.6%],F:0.5%,M:1.6%,n:3131	C:98.3%[S:97.2%,D:1.1%],F:0.5%,M:1.2%,n:3131	12110	Onchocerca volvulus	97.9	97.3	0.6	0.5	1.6	3131	98.3	97.2	1.1	0.5	1.2	3131	12110		Onchocerca volvulus	97.9	97.3	0.6	0.5	1.6	98.3	97.2	1.1	0.5	1.2	12110
Brugia malayi	C:99.2%[S:98.5%,D:0.7%],F:0.1%,M:0.7%,n:3131	C:98.9%[S:98.3%,D:0.6%],F:0.2%,M:0.9%,n:3131	10940	Brugia malayi	99.2	98.5	0.7	0.1	0.7	3131	98.9	98.3	0.6	0.2	0.9	3131	10940		Brugia malayi	99.2	98.5	0.7	0.1	0.7	98.9	98.3	0.6	0.2	0.9	10940
Ascaris suum	C:95.0%[S:92.0%,D:3.0%],F:1.1%,M:3.9%,n:3131	C:79.9%[S:77.4%,D:2.5%],F:3.4%,M:16.7%,n:3131	17969	Ascaris suum													17969
	BUSCO assembly					BUSCO proteome					# of protein coding genes
Species	C	S	D	F	M	C	S	D	F	M
Oscheius tipulae (nOt3.0)	90.8	88.7	2.1	1.8	7.4	90.7	87.9	2.8	2.4	6.9	16138
Oscheius tipulae (nOt2.0)	90.5	87.7	2.8	2.4	7.1	89.1	86.2	2.9	2	8.9	14626
Auanema rhodensis	89.6	89.1	0.5	1.7	8.7	85.4	84.6	0.8	1.2	13.4	10861
Caenorhabditis elegans	99.4	98.9	0.5	0.1	0.5	100	99.6	0.4	0	0	20184
Caenorhabditis briggsae	99	98.4	0.6	0.4	0.6	99.2	98.5	0.7	0.4	0.4	20829
Caenorhabditis nigoni	99.4	98.6	0.8	0.1	0.5	96.8	95.7	1.1	1.4	1.8	29167
Caenorhabditis remanei	99.2	98.1	1.1	0.3	0.5	93.1	91.9	1.2	0.9	6	26308
Caenorhabditis inopinata	98.8	97.9	0.9	0.4	0.8	98.7	97.7	1	0.2	1.1	21443
Haemonchus contortus	94.3	93.2	1.1	0.8	4.9	93.1	91.6	1.5	1.1	5.8	19473
Pristionchus pacificus	82.7	81.1	1.6	1.3	16	77.4	75.2	2.2	1	21.6	25992
Steinernema carpocapsae	78.3	74.8	3.5	3	18.7	74.7	70.9	3.8	3.8	21.5	30825
Meloidogyne hapla	58.1	57	1.1	2.2	39.7	70.6	67.8	2.8	0.9	28.5	14419
Strongyloides ratti	68.2	66.5	1.7	1.5	30.3	70.6	67.8	2.8	0.9	28.5	12464
Onchocerca volvulus	97.9	97.3	0.6	0.5	1.6	98.3	97.2	1.1	0.5	1.2	12110
Brugia malayi	99.2	98.5	0.7	0.1	0.7	98.9	98.3	0.6	0.2	0.9	10940
Ascaris suum	95	92	3	1.1	3.9	79.9	77.4	2.5	3.4	16.7	17969
Species	BUSCO assembly	BUSCO --long assembly	# of protein coding genes
Oscheius tipulae (nOt3.0)	C:90.8%[S:88.7%,D:2.1%],F:1.8%,M:7.4%,n:3131	C:91.8%[S:89.7%,D:2.1%],F:1.5%,M:6.7%,n:3131	16138
Oscheius tipulae (nOt3.3)	C:90.7%[S:88.7%,D:2.0%],F:1.8%,M:7.5%,n:3131	C:90.7%[S:88.7%,D:2.0%],F:1.8%,M:7.5%,n:3131	16367
Oscheius tipulae (nOt2.0)	C:89.0%[S:86.5%,D:2.5%],F:2.1%,M:8.9%,n:3131	C:91.6%[S:89.0%,D:2.6%],F:1.6%,M:6.7%,n:3131	14626
Auanema rhodensis	C:89.6%[S:89.1%,D:0.5%],F:1.7%,M:8.7%,n:3131	C:89.8%[S:89.3%,D:0.5%],F:1.4%,M:8.8%,n:3131	10861
Caenorhabditis elegans	C:99.4%[S:98.9%,D:0.5%],F:0.1%,M:0.5%,n:3131	C:99.4%[S:98.9%,D:0.5%],F:0.1%,M:0.5%,n:3131	20184
Caenorhabditis briggsae	C:99.0%[S:98.4%,D:0.6%],F:0.4%,M:0.6%,n:3131		20829
Caenorhabditis nigoni	C:99.4%[S:98.6%,D:0.8%],F:0.1%,M:0.5%,n:3131		29167
Caenorhabditis remanei	C:99.2%[S:98.1%,D:1.1%],F:0.3%,M:0.5%,n:3131	C:99.2%[S:98.1%,D:1.1%],F:0.3%,M:0.5%,n:3131	26308
Caenorhabditis inopinata	C:98.8%[S:97.9%,D:0.9%],F:0.4%,M:0.8%,n:3131	C:98.8%[S:97.9%,D:0.9%],F:0.4%,M:0.8%,n:3131	21443
Haemonchus contortus	C:94.3%[S:93.2%,D:1.1%],F:0.8%,M:4.9%,n:3131	C:94.4%[S:93.3%,D:1.1%],F:0.9%,M:4.7%,n:3131	19473
Pristionchus pacificus	C:82.7%[S:81.1%,D:1.6%],F:1.3%,M:16.0%,n:3131	C:82.4%[S:80.8%,D:1.6%],F:1.6%,M:16.0%,n:3131	25992
Steinernema carpocapsae	C:78.3%[S:74.8%,D:3.5%],F:3.0%,M:18.7%,n:3131	C:78.3%[S:74.8%,D:3.5%],F:3.0%,M:18.7%,n:3131	30825
Meloidogyne hapla	C:58.1%[S:57.0%,D:1.1%],F:2.2%,M:39.7%,n:3131	C:59.4%[S:58.3%,D:1.1%],F:2.3%,M:38.3%,n:3131	14419
Strongyloides ratti	C:68.2%[S:66.5%,D:1.7%],F:1.5%,M:30.3%,n:3131	C:68.0%[S:66.4%,D:1.6%],F:1.5%,M:30.5%,n:3131	12464
Onchocerca volvulus	C:97.9%[S:97.3%,D:0.6%],F:0.5%,M:1.6%,n:3131	C:98.0%[S:97.4%,D:0.6%],F:0.4%,M:1.6%,n:3131	12110
Brugia malayi	C:99.2%[S:98.5%,D:0.7%],F:0.1%,M:0.7%,n:3131	C:99.1%[S:98.4%,D:0.7%],F:0.2%,M:0.7%,n:3131	10940
Ascaris suum	C:95.0%[S:92.0%,D:3.0%],F:1.1%,M:3.9%,n:3131	C:94.7%[S:91.7%,D:3.0%],F:1.2%,M:4.1%,n:3131	17969

## Sheet: Table_S4_Sources_of_Kraken_data
Species	Link
Oscheius tipulae	ftp://ftp.ncbi.nlm.nih.gov/genomes/all/GCA/900/184/235/GCA_900184235.1_Oscheius_tipulae_assembly_v2/GCA_900184235.1_Oscheius_tipulae_assembly_v2_genomic.fna.gz
Caenorhabditis elegans	ftp://ftp.ncbi.nlm.nih.gov/genomes/all/GCF/000/002/985/GCF_000002985.6_WBcel235/GCF_000002985.6_WBcel235_genomic.fna.gz
Caenorhabditis briggsae	ftp://ftp.ncbi.nlm.nih.gov/genomes/all/GCF/000/002/985/GCF_000002985.6_WBcel235/GCF_000002985.6_WBcel235_genomic.fna.gz
Caenorhabditis nigoni	ftp://ftp.ncbi.nlm.nih.gov/genomes/all/GCA/002/742/825/GCA_002742825.1_nigoni.pc_2016.07.14/GCA_002742825.1_nigoni.pc_2016.07.14_genomic.fna.gz
Caenorhabditis inopinata	ftp://ftp.ncbi.nlm.nih.gov/genomes/all/GCA/003/052/745/GCA_003052745.1_Sp34_v7/GCA_003052745.1_Sp34_v7_genomic.fna.gz
Haemonchus contortus	ftp://ftp.ncbi.nlm.nih.gov/genomes/all/GCA/007/637/855/GCA_007637855.2_ASM763785v2/GCA_007637855.2_ASM763785v2_genomic.fna.gz
Pristionchus pacificus	ftp://ftp.ncbi.nlm.nih.gov/genomes/all/GCA/000/180/635/GCA_000180635.3_El_Paco/GCA_000180635.3_El_Paco_genomic.fna.gz
Meloidogyne hapla	ftp://ftp.ncbi.nlm.nih.gov/genomes/all/GCA/000/172/435/GCA_000172435.1_Freeze_1/GCA_000172435.1_Freeze_1_genomic.fna.gz
Strongyloides ratti	ftp://ftp.ncbi.nlm.nih.gov/genomes/all/GCF/001/040/885/GCF_001040885.1_S_ratti_ED321/GCF_001040885.1_S_ratti_ED321_genomic.fna.gz
Onchocerca volvulus	ftp://ftp.ncbi.nlm.nih.gov/genomes/all/GCA/000/499/405/GCA_000499405.2_ASM49940v2/GCA_000499405.2_ASM49940v2_genomic.fna.gz
Brugia malayi	ftp://ftp.ncbi.nlm.nih.gov/genomes/all/GCF/000/002/995/GCF_000002995.3_ASM299v2/GCF_000002995.3_ASM299v2_genomic.fna.gz

## Sheet: Table_S5_Kraken_filtering
Superkingdom	Phylum	Total number of bases	Number of sequences
Bacteria	Proteobacteria	87185310828	5898270
Eukaryota	Nematoda	20728191131	2835558
Bacteria	Bacteroidetes	205721843	15301
NA|Bacteria|Eukaryota	NA	109051955	54269
Bacteria	Actinobacteria	89155134	6327
Eukaryota	Chordata	48258726	10874
Bacteria	Firmicutes	21325116	4945
Eukaryota	Ascomycota	4380260	1217
Bacteria	Tenericutes	3984814	919
Bacteria	Cyanobacteria	2993440	622
Bacteria	Planctomycetes	1103149	186
Bacteria	Fusobacteria	1050278	257
Bacteria	Spirochaetes	889419	210
Bacteria	Thermotogae	207234	49
Eukaryota	Basidiomycota	195581	38
Bacteria	Verrucomicrobia	146155	25
Bacteria	Chlamydiae	112778	21
Bacteria	Acidobacteria	110156	19
Bacteria	Chloroflexi	105978	28
Eukaryota	Microsporidia	99924	13
Bacteria	Chlorobi	88431	13
Bacteria	Aquificae	86567	23
Bacteria	Deinococcus-Thermus	79879	29
Bacteria	Deferribacteres	72027	21
Bacteria	Nitrospirae	49624	13
Bacteria	Ignavibacteriae	49299	8
Bacteria	Synergistetes	46203	5
Bacteria	Thermodesulfobacteria	30584	8
Bacteria	Candidatus Gracilibacteria	23976	10
Bacteria	Calditrichaeota	22029	5
Bacteria	Armatimonadetes	20877	2
Bacteria	Fibrobacteres	17770	6
Bacteria	Gemmatimonadetes	14963	4
Bacteria	Elusimicrobia	11891	5
Bacteria	Kiritimatiellaeota	10426	2
Bacteria	Dictyoglomi	8854	4
Bacteria	Chrysiogenetes	8744	3
Bacteria	Candidatus Cloacimonetes	8106	3
Bacteria	Caldiserica	3046	1
Bacteria	Balneolaeota	2232	1

## Sheet: Table_S6_Oscheius_BUSCO_scores
Read set	Assembler	Genome contiguity metrics*					BUSCO** scores
		# contigs	Largest contig	Total length	N75	L75	C*	D*	F*	M*
raw	flyemeta§	7	11.3	60.11	9.02	5	88.4	2	2.1	9.5
	redbean	945	0.59	47.46	0.04	323	62.3	1.9	1.9	35.8
	shasta	55	5.66	59.83	1.74	12	89	2.3	2.1	8.8
de-contaminated	flyemeta	11	11.3	60.04	9.01	5	88.7	2	2.2	9.1
	flye	7	11.24	60	9.01	5	88.9	2	2.1	9
	redbean	19	11.17	59.63	8.82	5	88.7	2	2.2	9.1
	shasta	34	9.99	59.47	2.26	9	89.2	2.5	2	8.8
	canu	13	11.28	59.94	8.83	5	88.6	2.3	2.1	9.3
40x error corrected	flyemeta†	13	11.18	59.87	5.13	6	89.1	2.1	2.1	8.8
	flye	7	11.29	60	9.03	5	88.4	1.9	2.2	9.4
	redbean	29	11.17	59.09	2.58	9	88.5	2.1	2.2	9.3
	shasta	964	0.26	52.46	0.05	509	75.2	11.7	2	22.7

[truncated: 23 more sheets: Table_S7_Base_coverage_of_Osche, Table_S8_Metrics_of_Nematode_ge, Table_S9_Nematode_genome_BUSCO, Table_S10_Nigon_defining_loci_i, Table_S11_Nigon_KEGG_enrichment, Data_for_Table_S11_Nigon_loci_K, Table_S12_NigonLoci_Meloidogyne, Data_for_Figure_6_Nigons_per_Sp, Figure_6B_Nigon_Loci_Per_Specie, Figure_6_alter_Proportional_Nig, Figure_6D_alternate2_Nigon_Coun, Figure_S2_SL_and_5s_rRNA_loci_i, Data_for_Figure_S2_Otipulae_5S_, Figure_S6A_Bmalayi_CG_chart, Figure_S6B_Bmalayi_CG_SDchart, Data_for_Figure_S6AB_Bmalayi_CG, Figure_S6C_Ovolvulus_CG, Figure_S6D_Ovolvulus_CG_SD, Data_For_Figure_S6CD_Ovolvulus_, Figure_S6E_Celegans_GC …]
